# Supplementary material
Source: Springer Nature journal article supplement (https://www.springermedizin.de/resource/supplementary/12885_2013_4369_MOESM1_ESM.pdf/9466074)
Supplement: MOESM1 [file 9466074]

**Additional file 1.**

Case 01

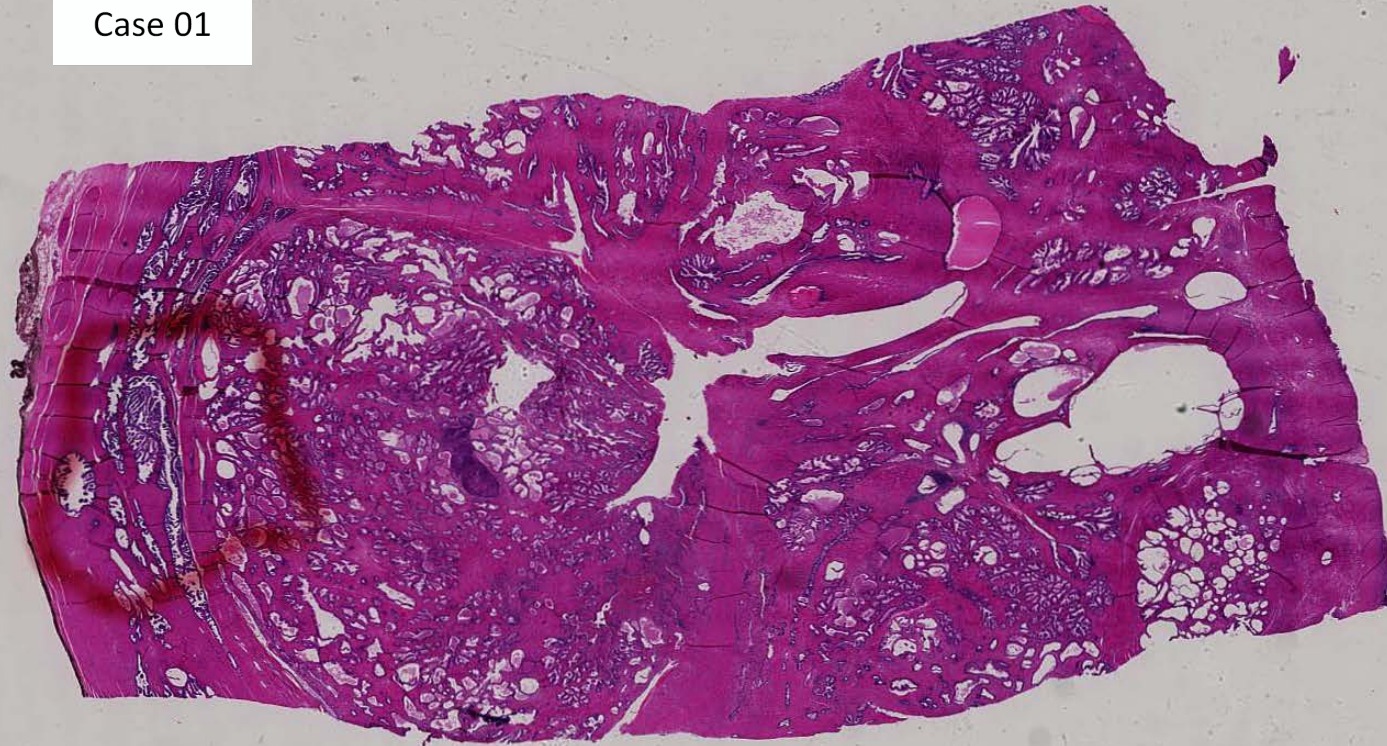

0 2.5 5 7.5 10 mm

Case 02

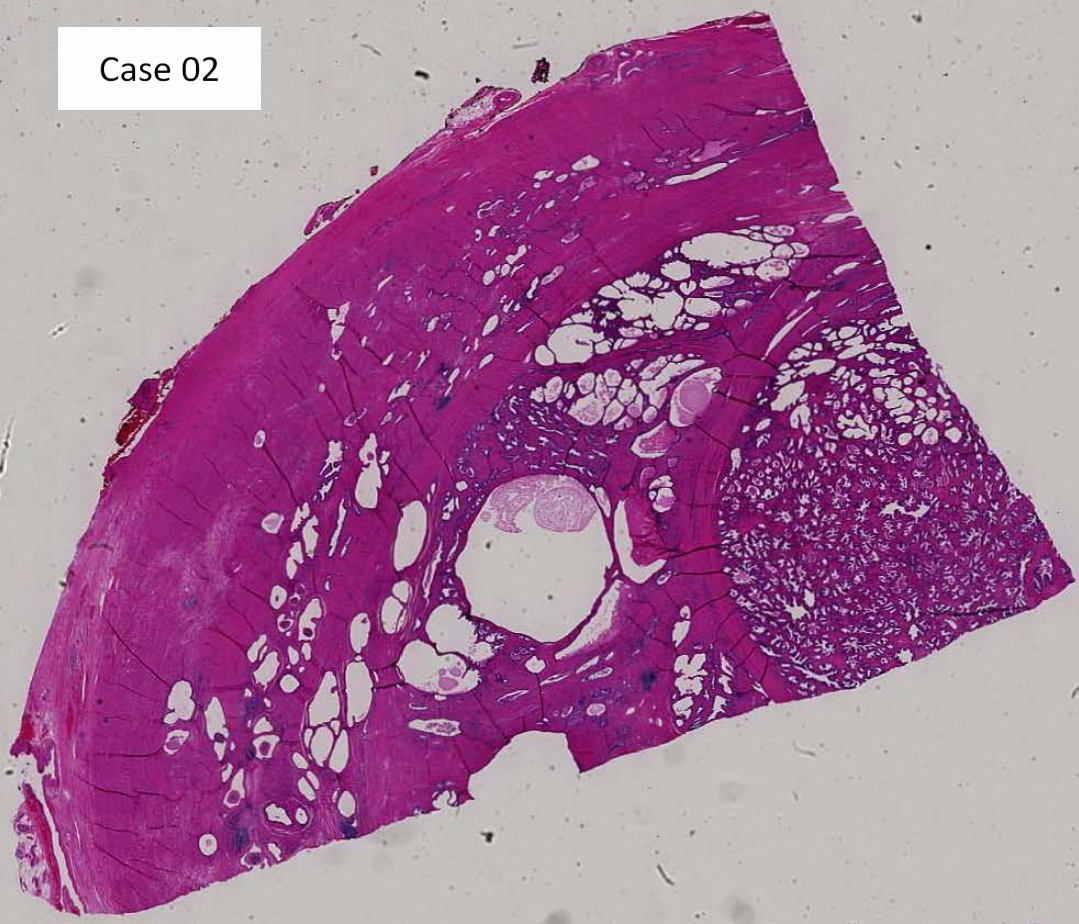

0 2.5 5 7.5 10 mm



Case 05

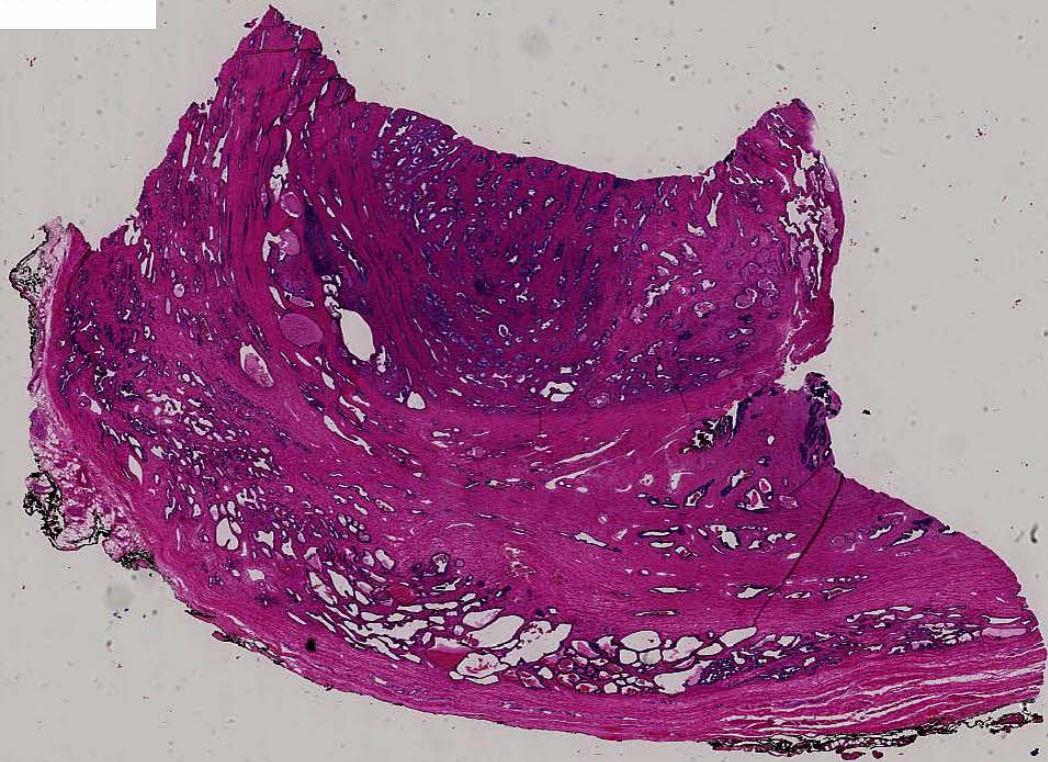

0 2.5 5 7.5 10 mm

Case 07

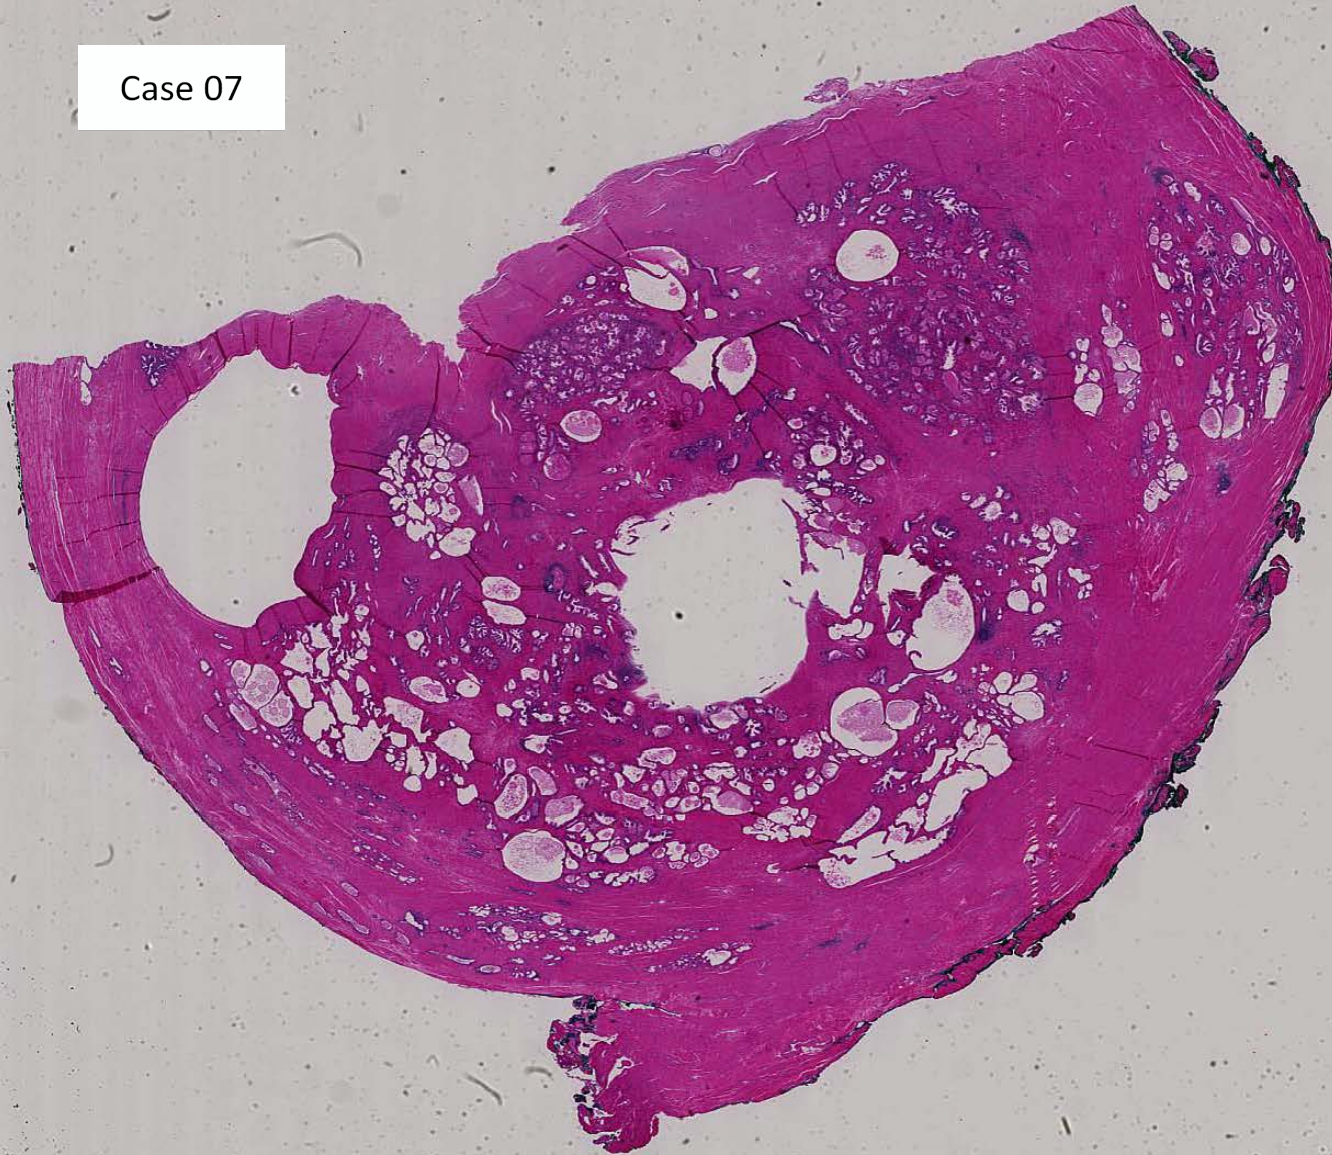

0 2.5 5 7.5 10 mm



Case 11

0 5 10 15 20 mm

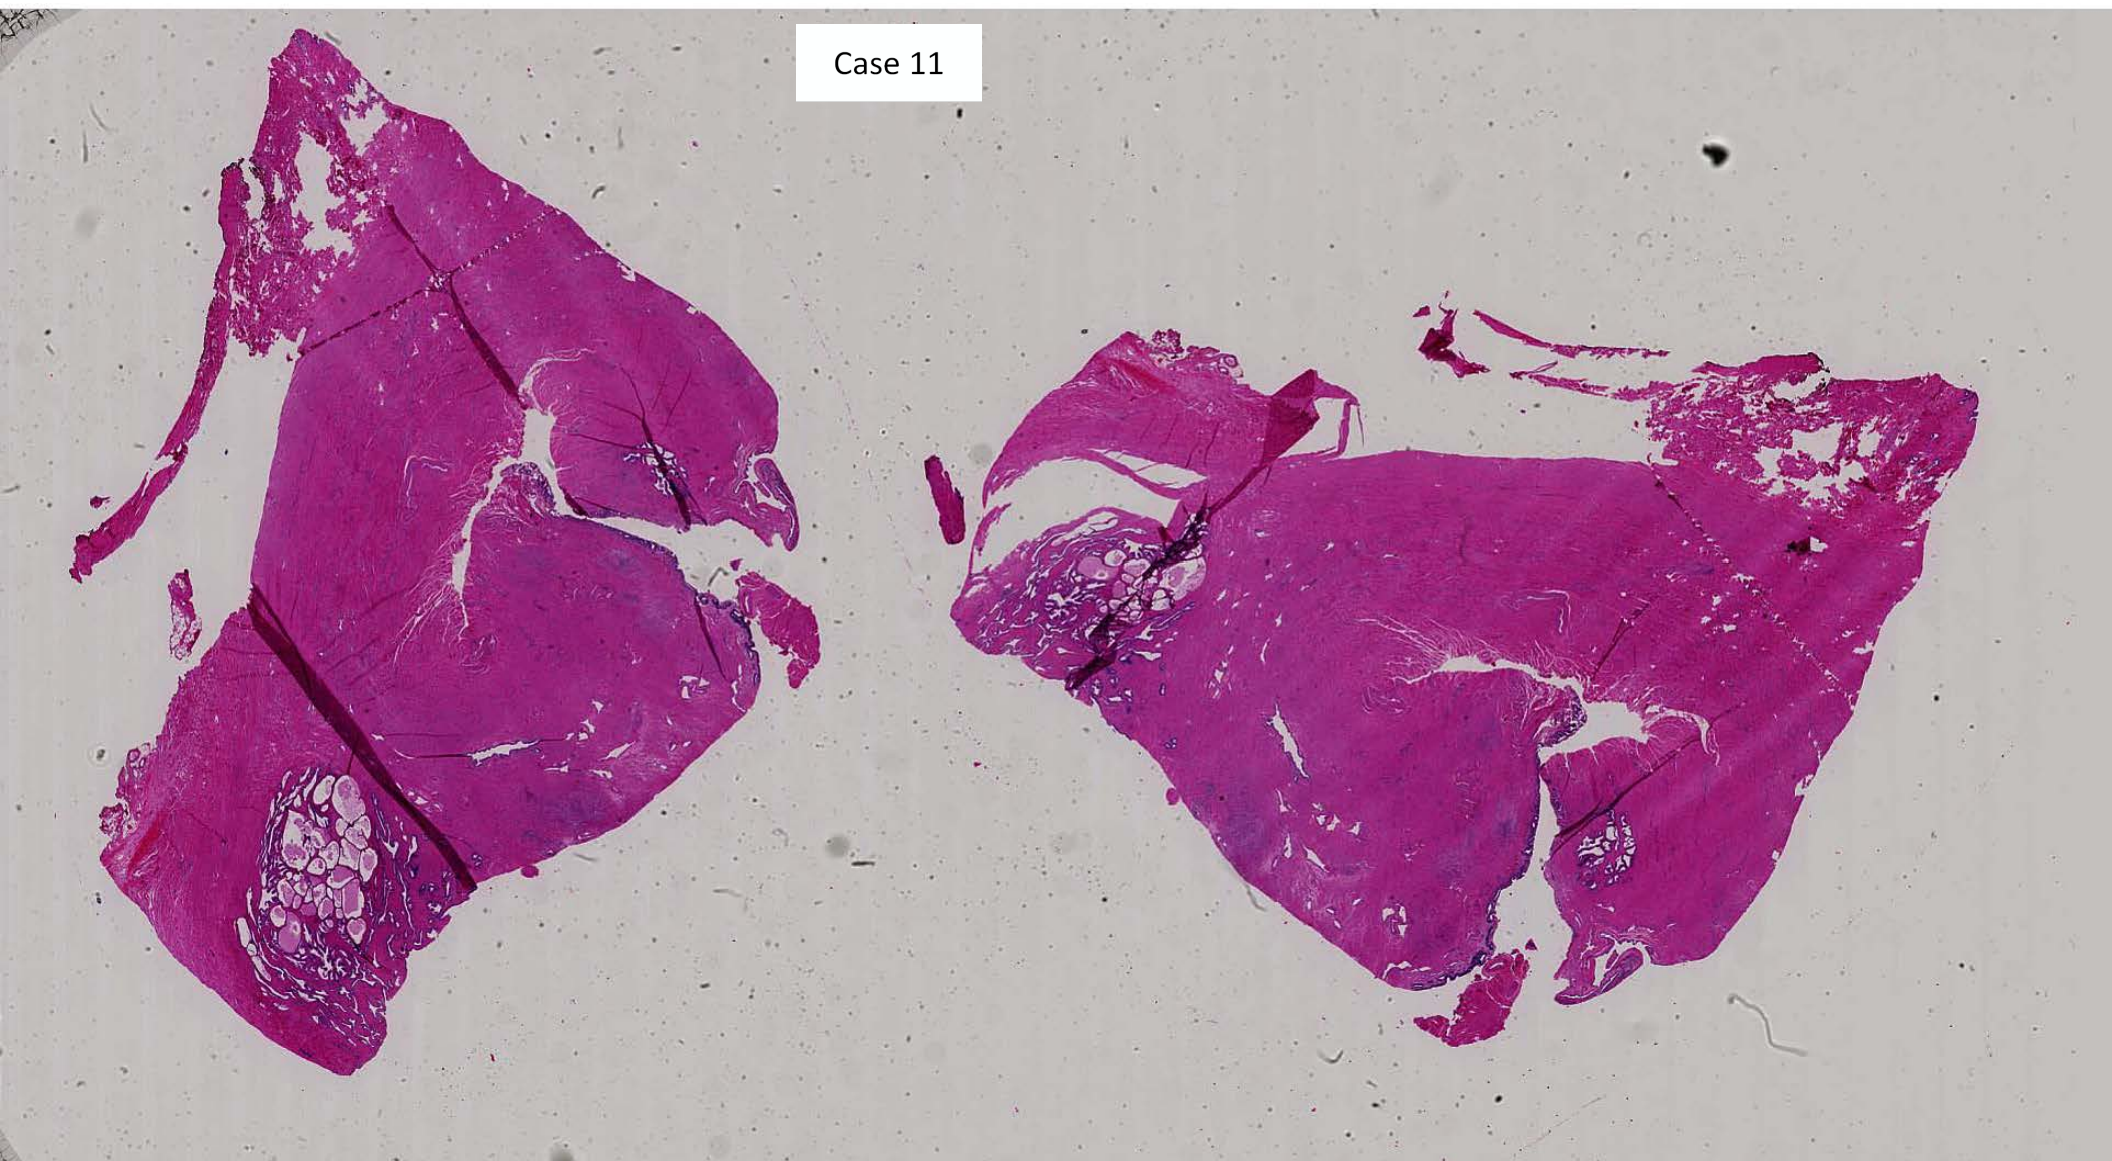



Case 12

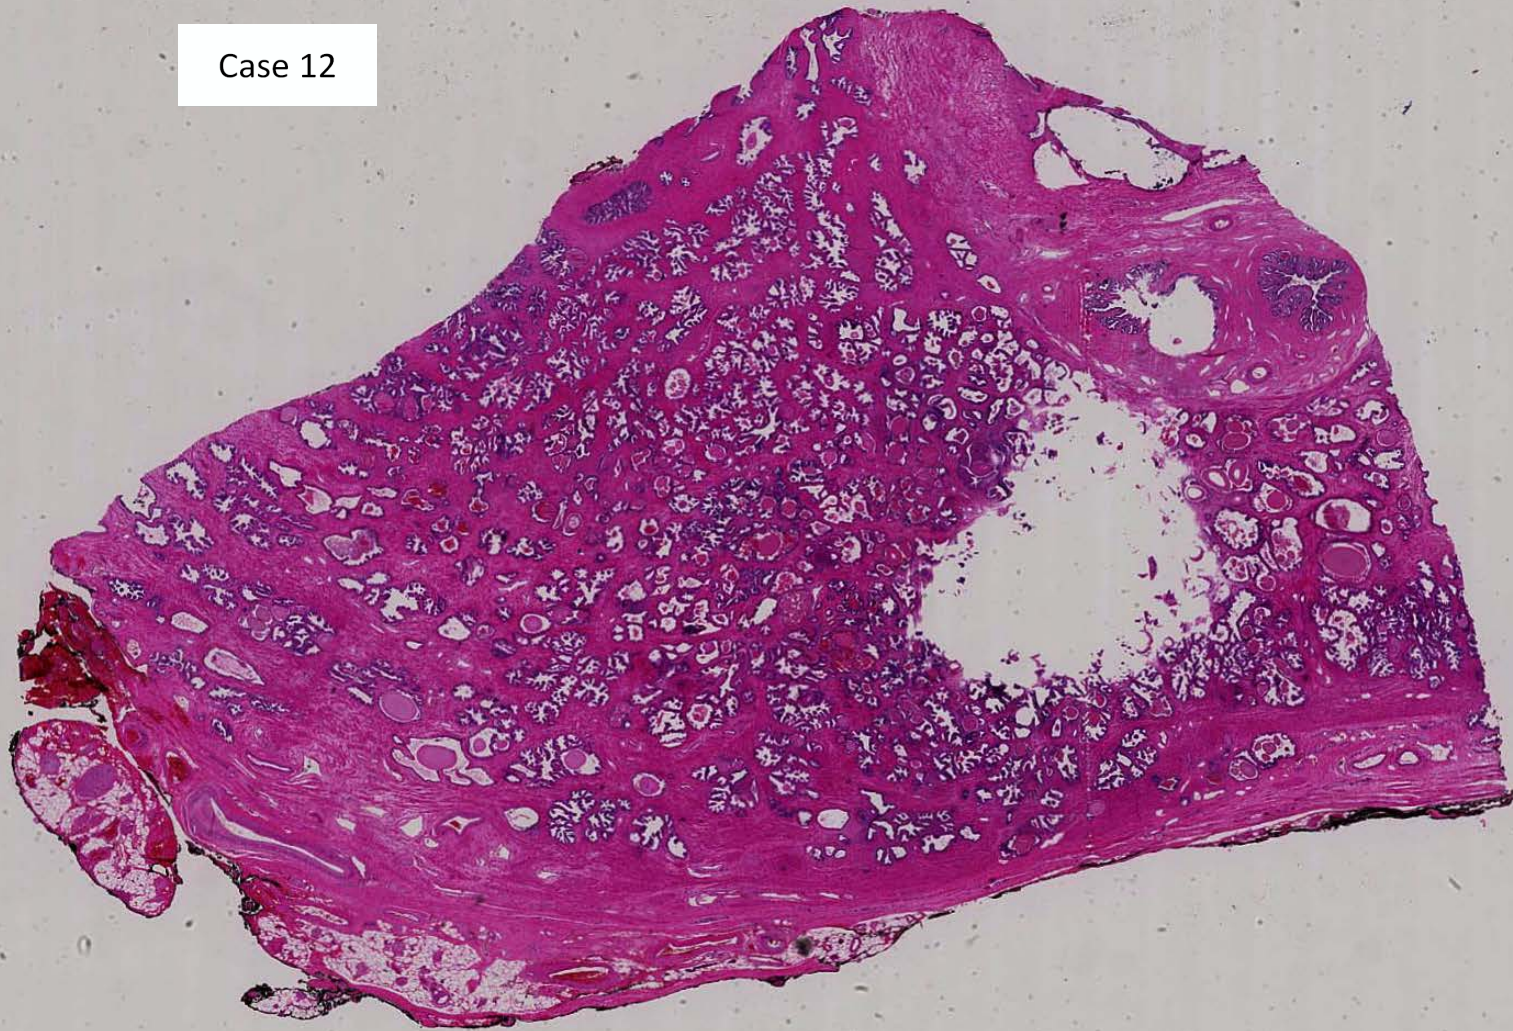

0 2.5 5 7.5 10 mm

Case 13

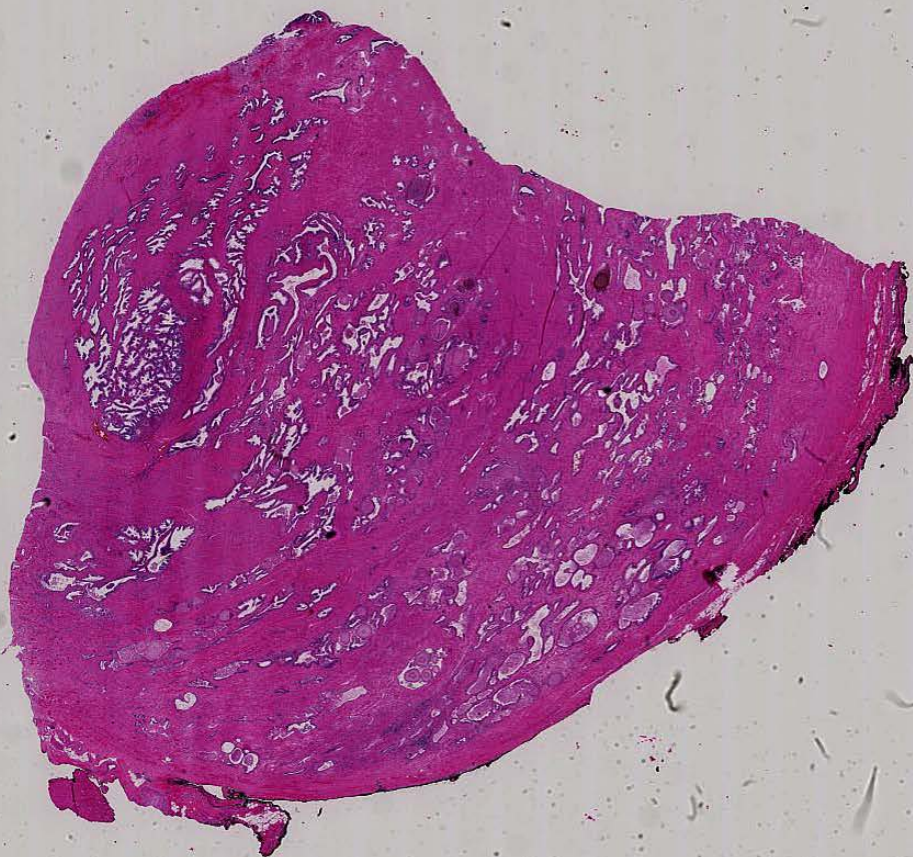

0 2.5 5 7.5 10 mm



Case 14

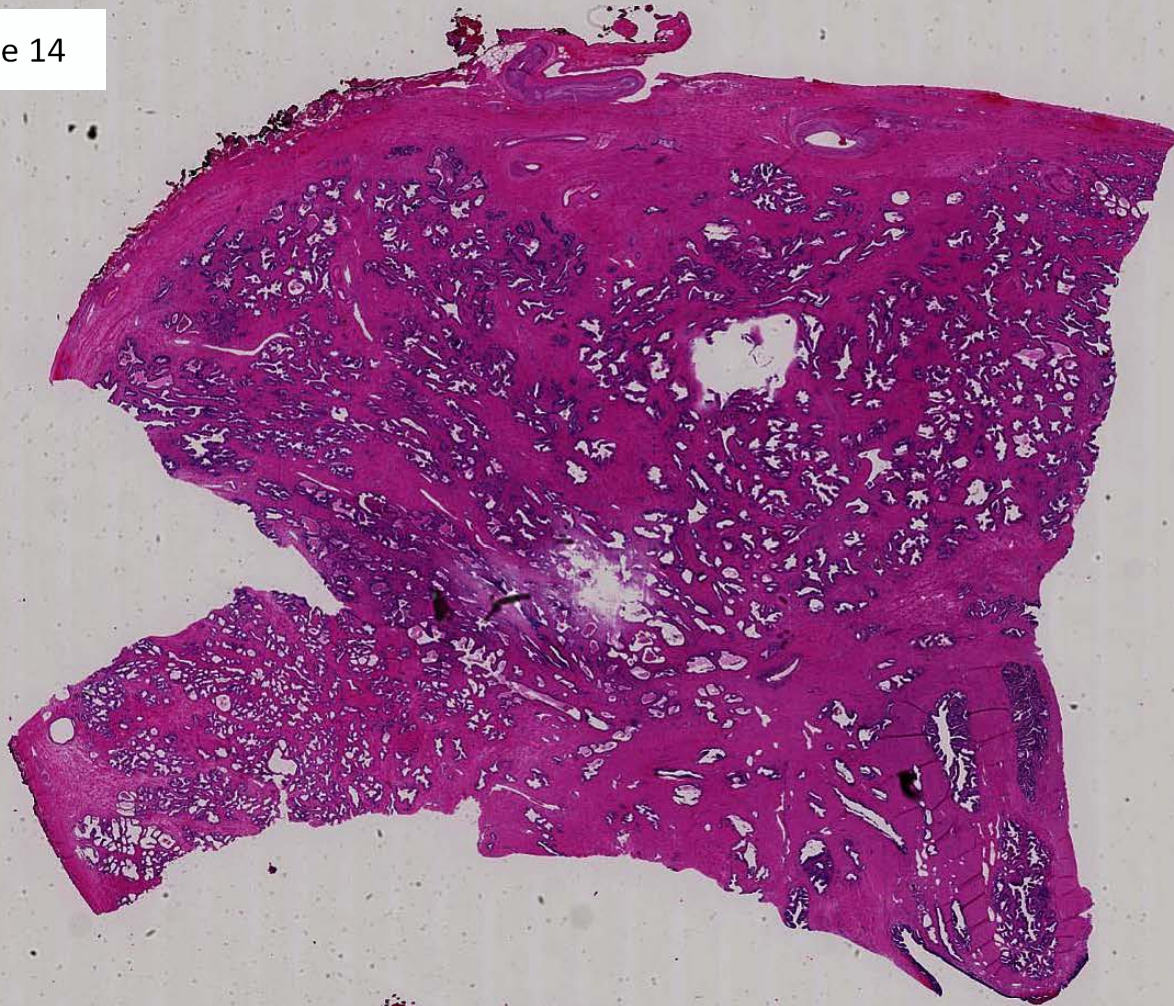

0 2.5 5 7.5 10 mm



Case 15

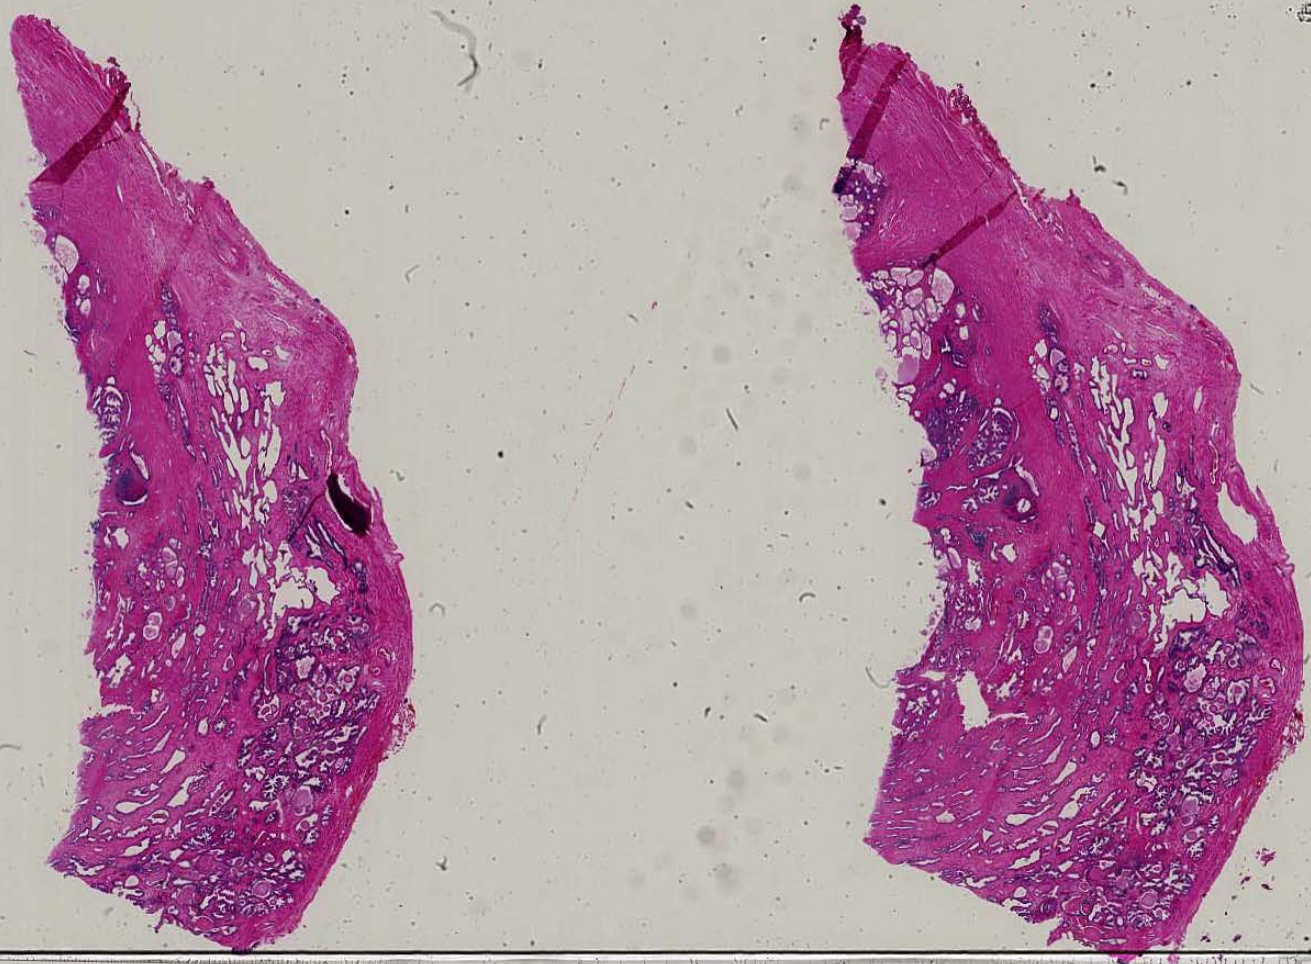

0 5 10 15 20 mm



Case 18

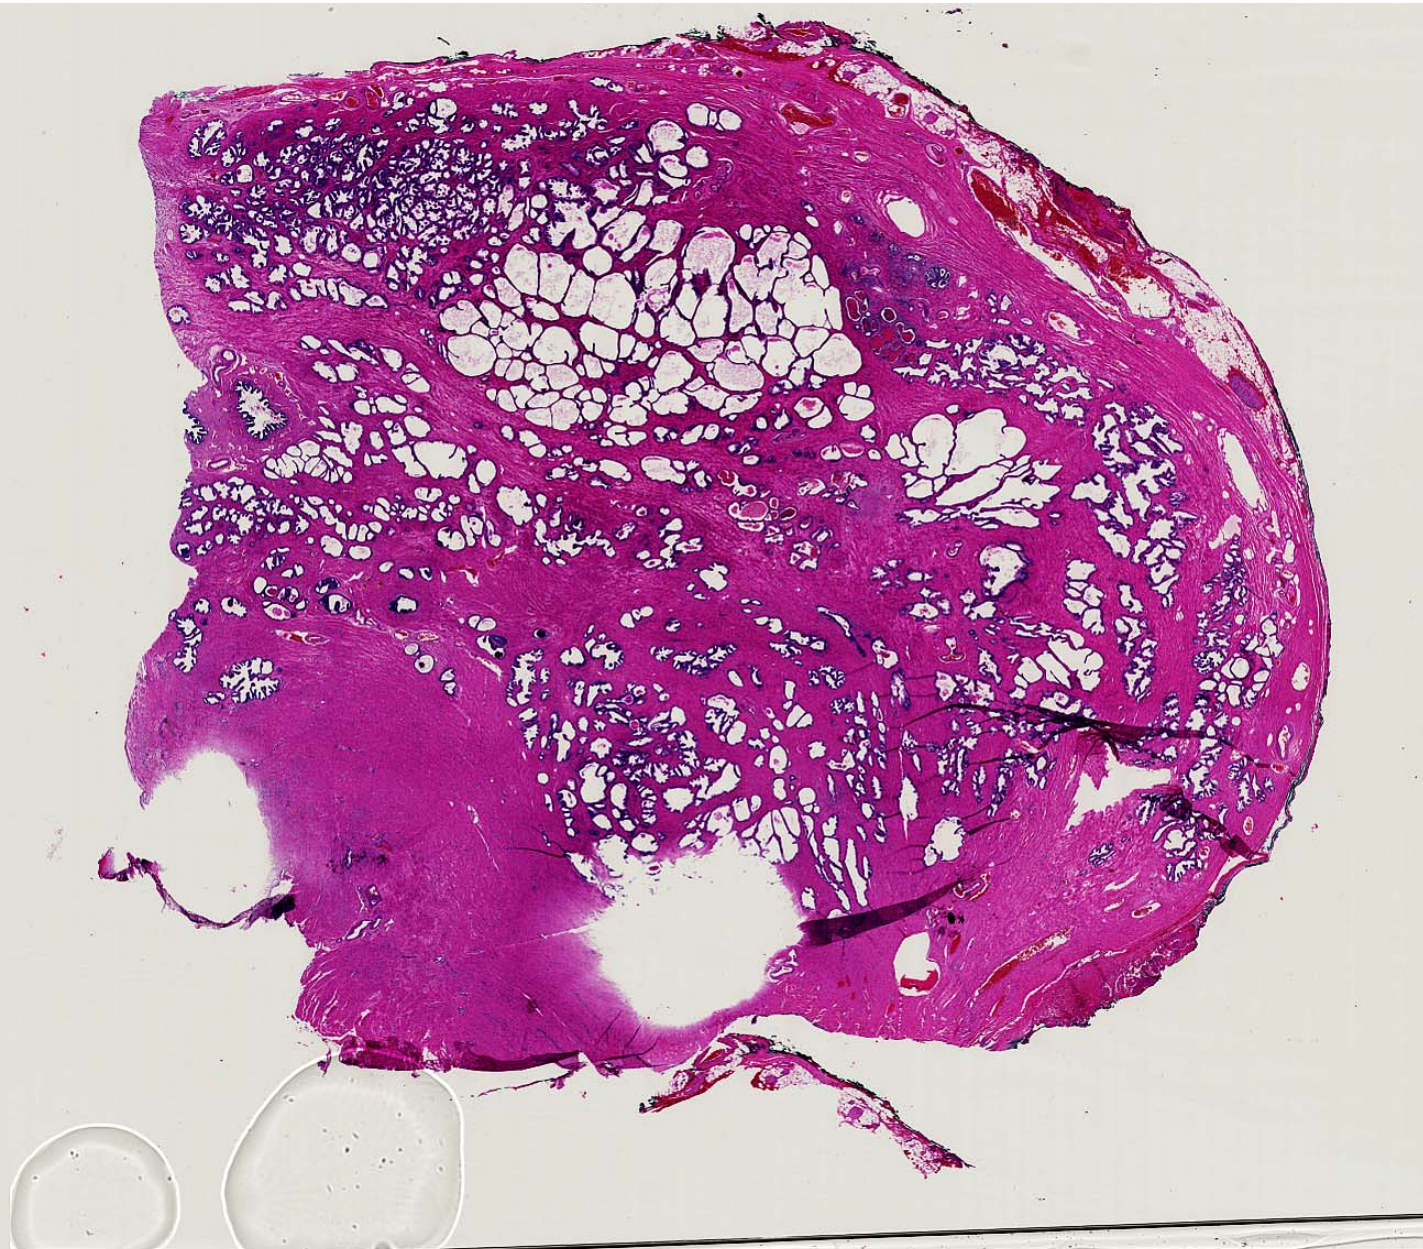

0 2.5 5 7.5 10 mm



Case 20

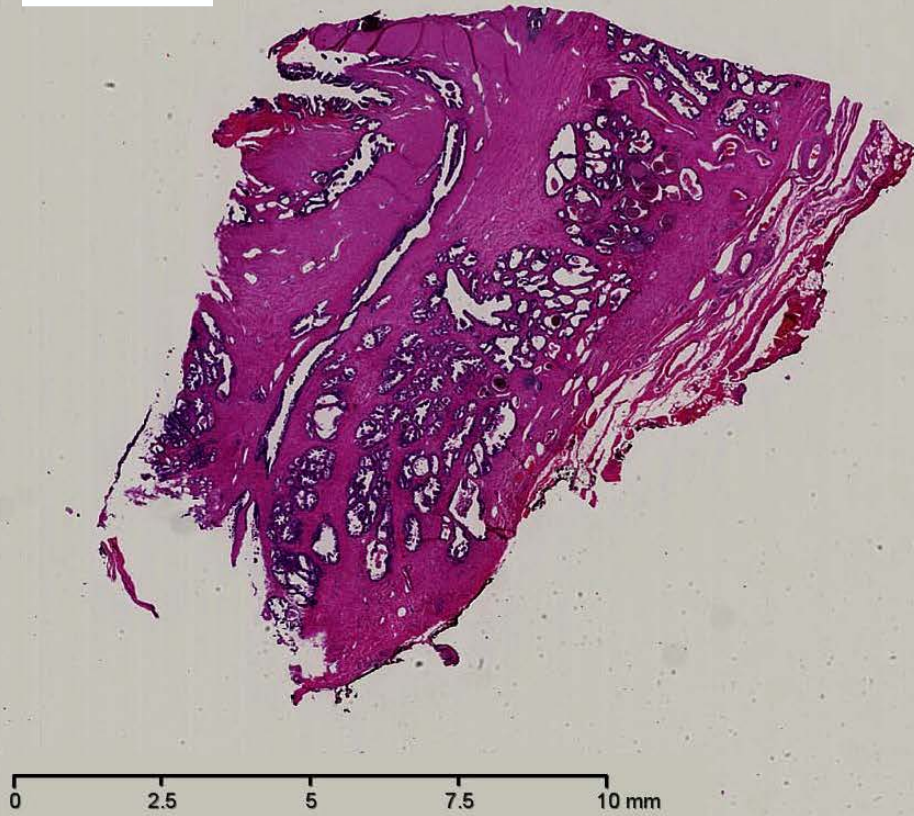

Case 22

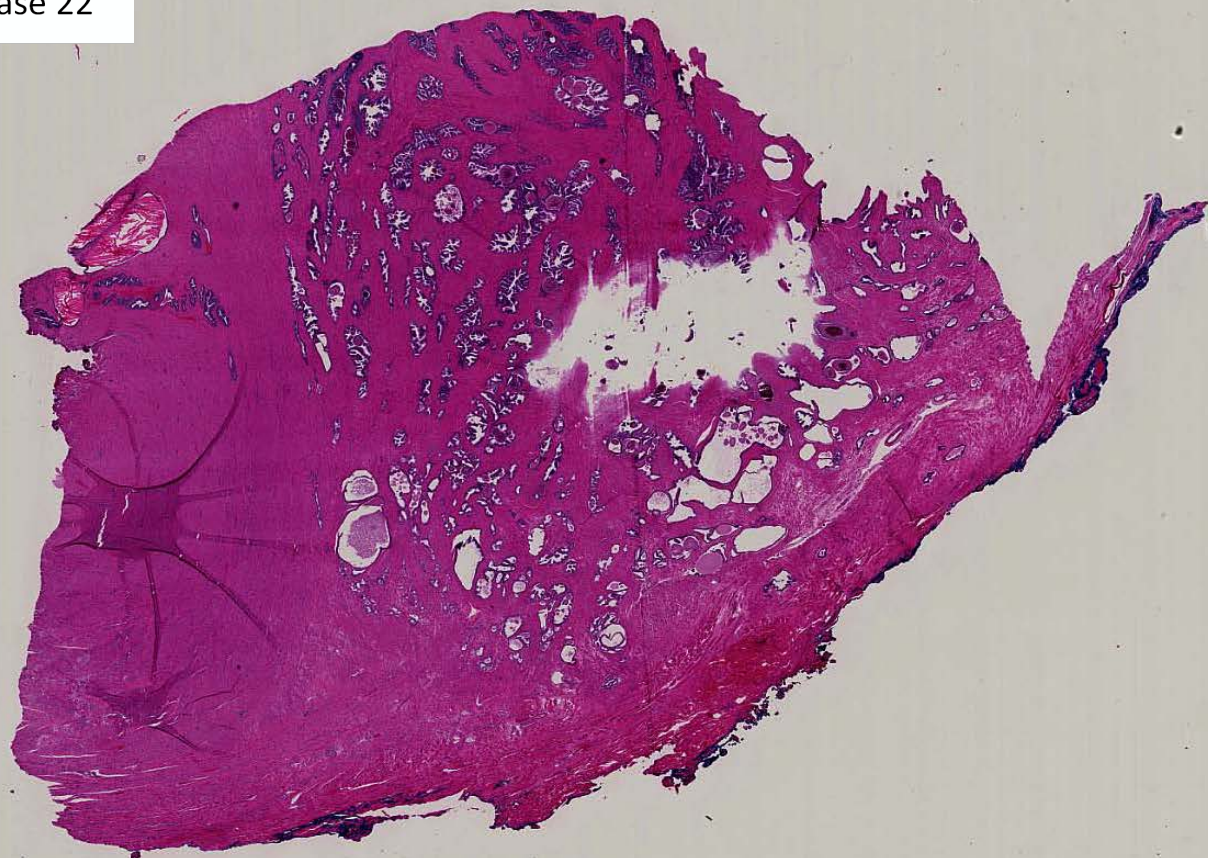

0 2.5 5 7.5 10 mm



Case 25

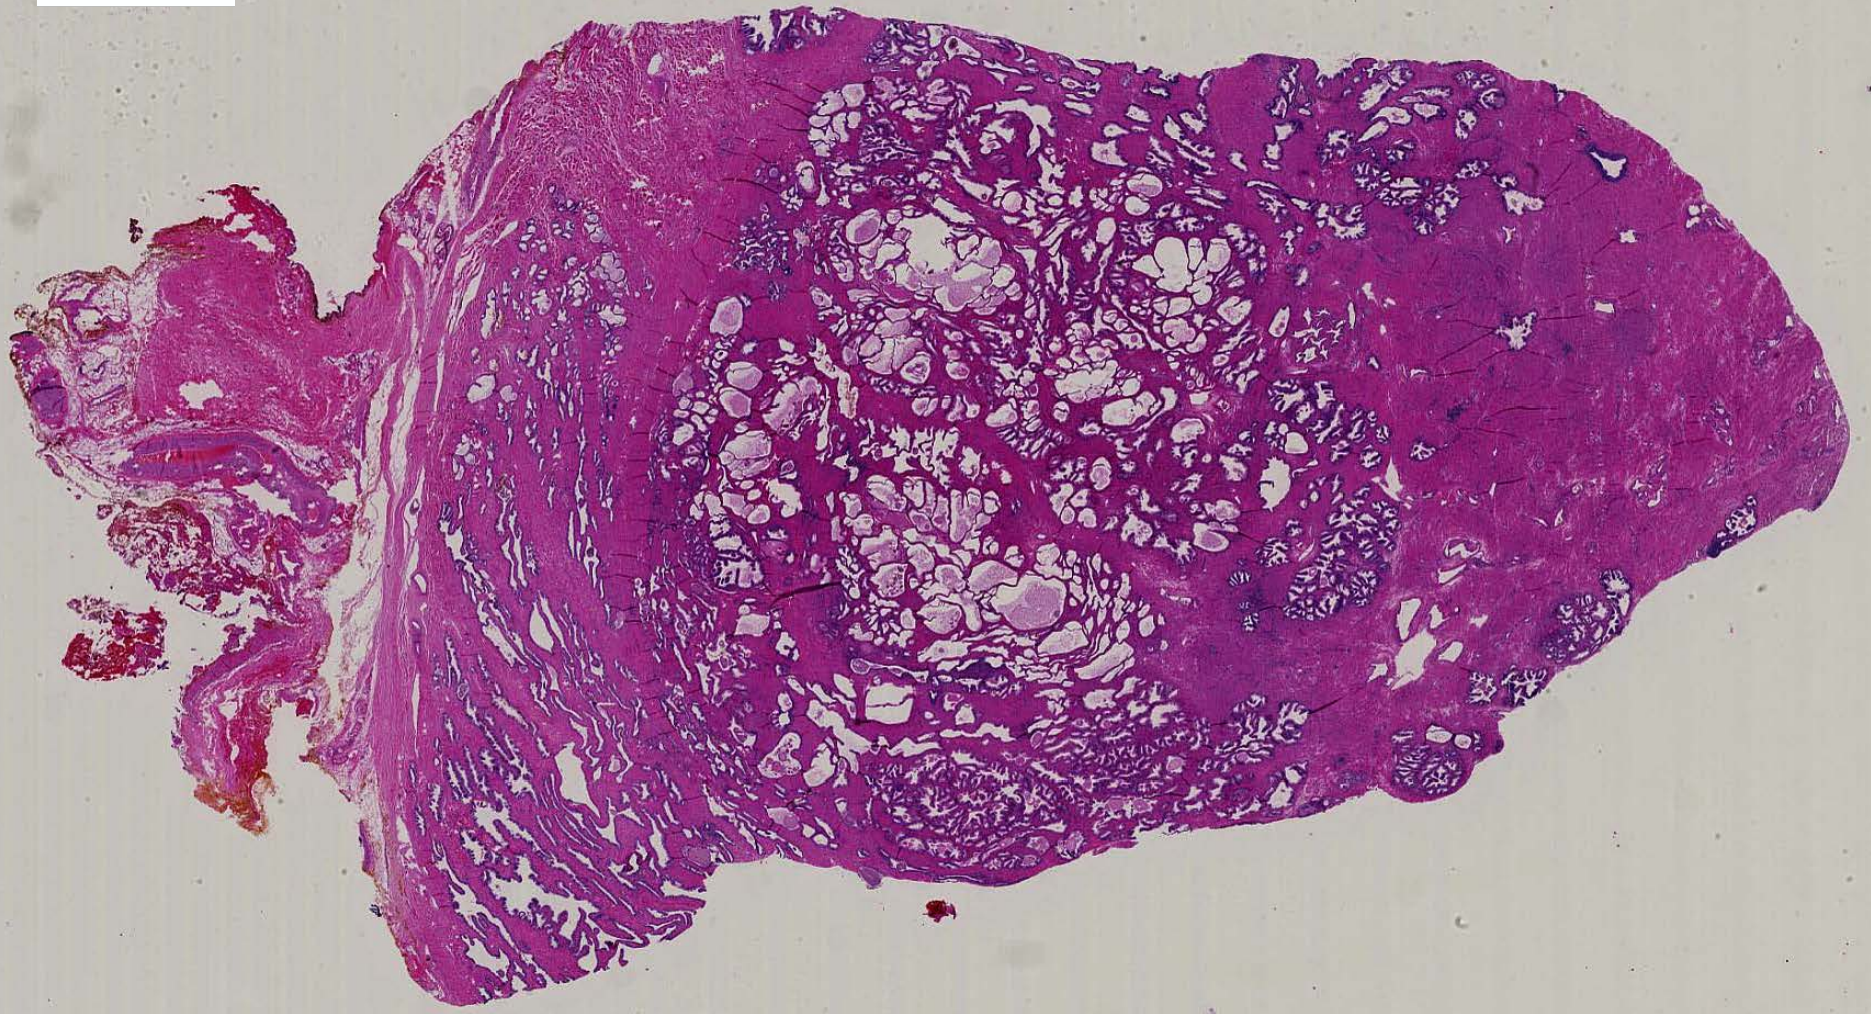

0 2.5 5 7.5 10 mm



Case 27

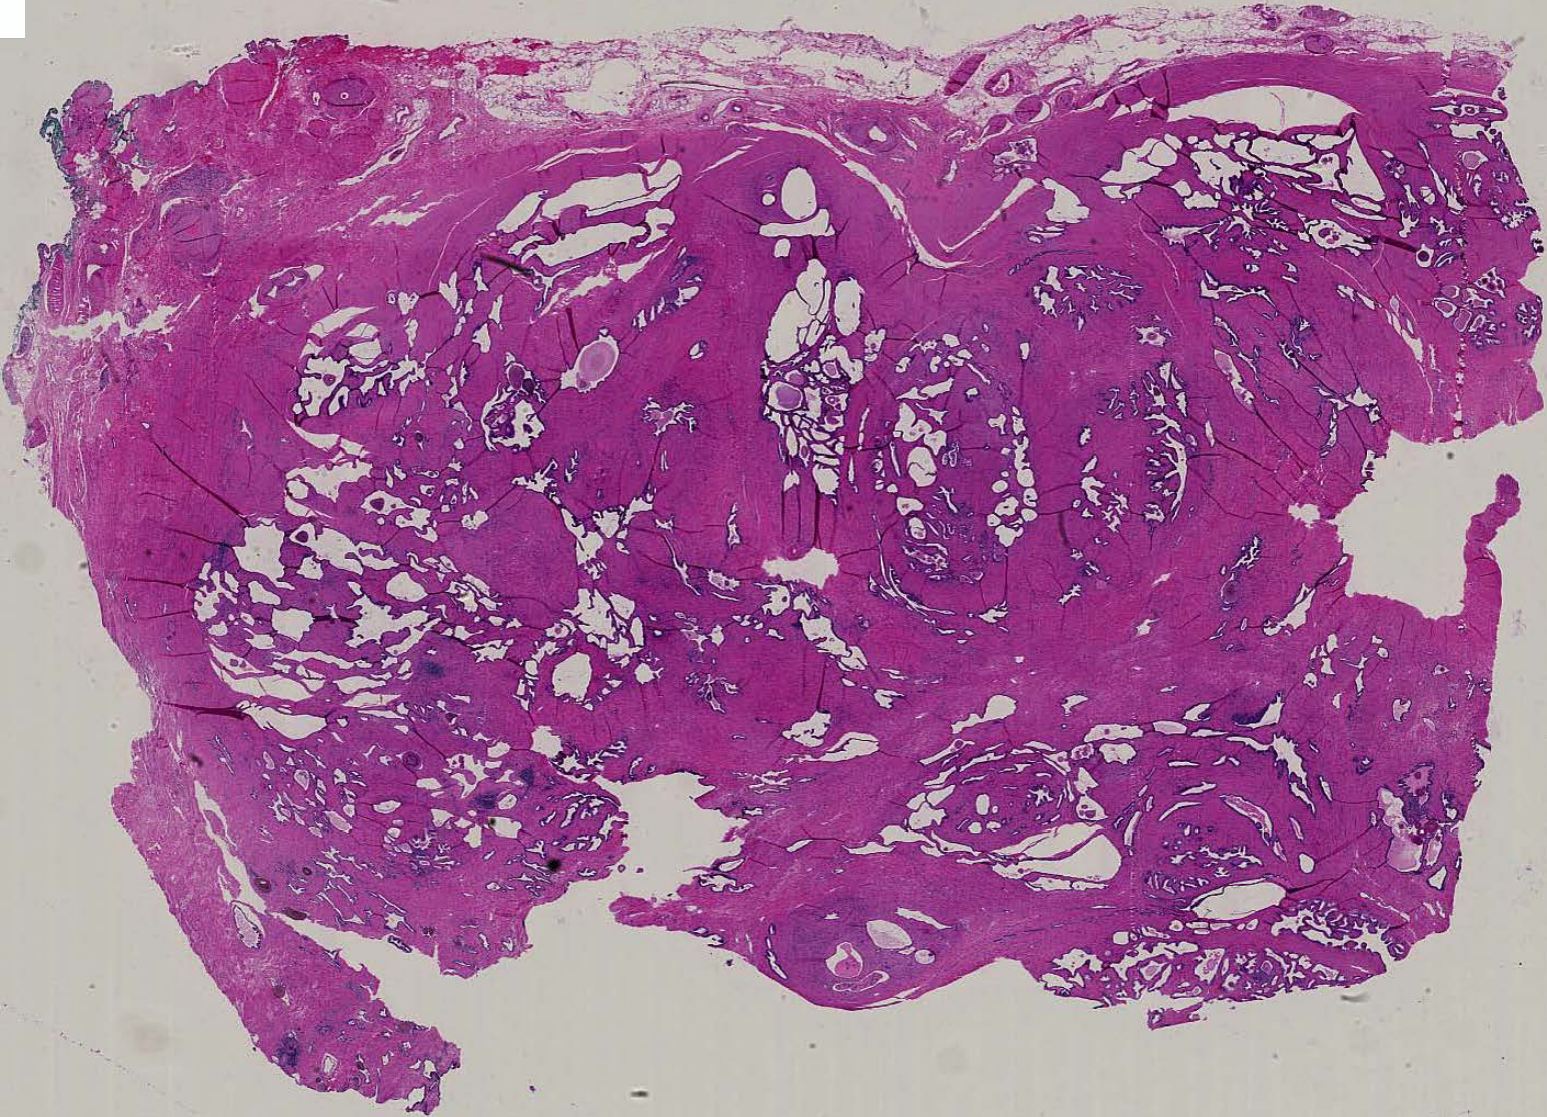

0 2.5 5 7.5 10 mm



Case 29

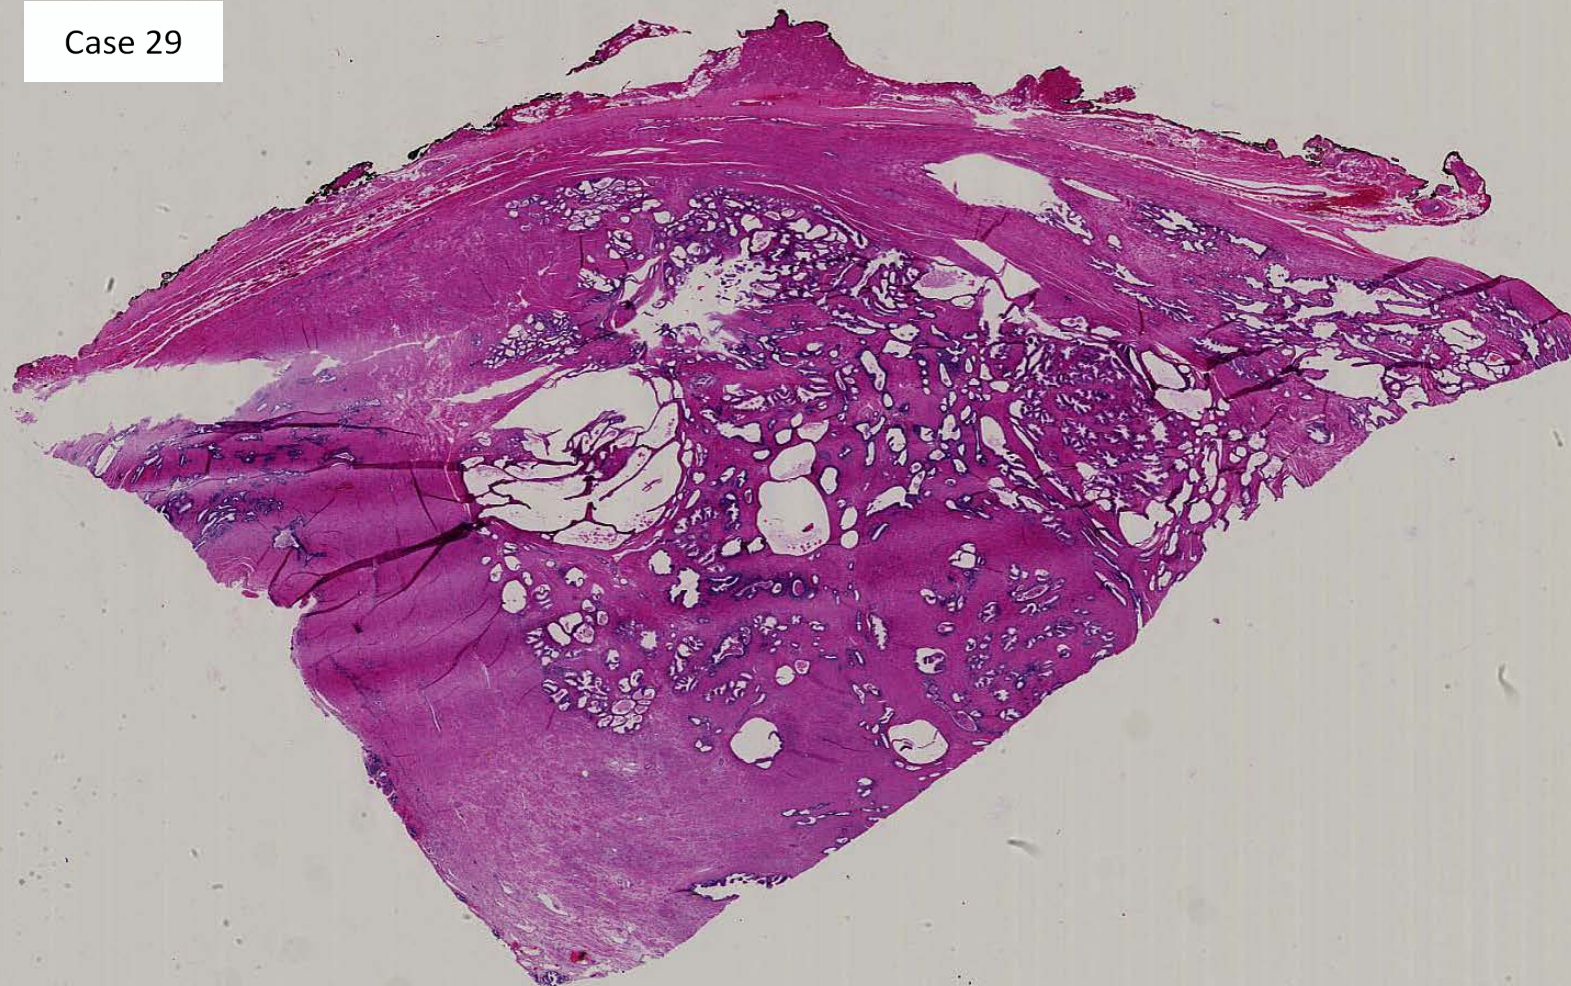

0 2.5 5 7.5 10 mm



Case 32

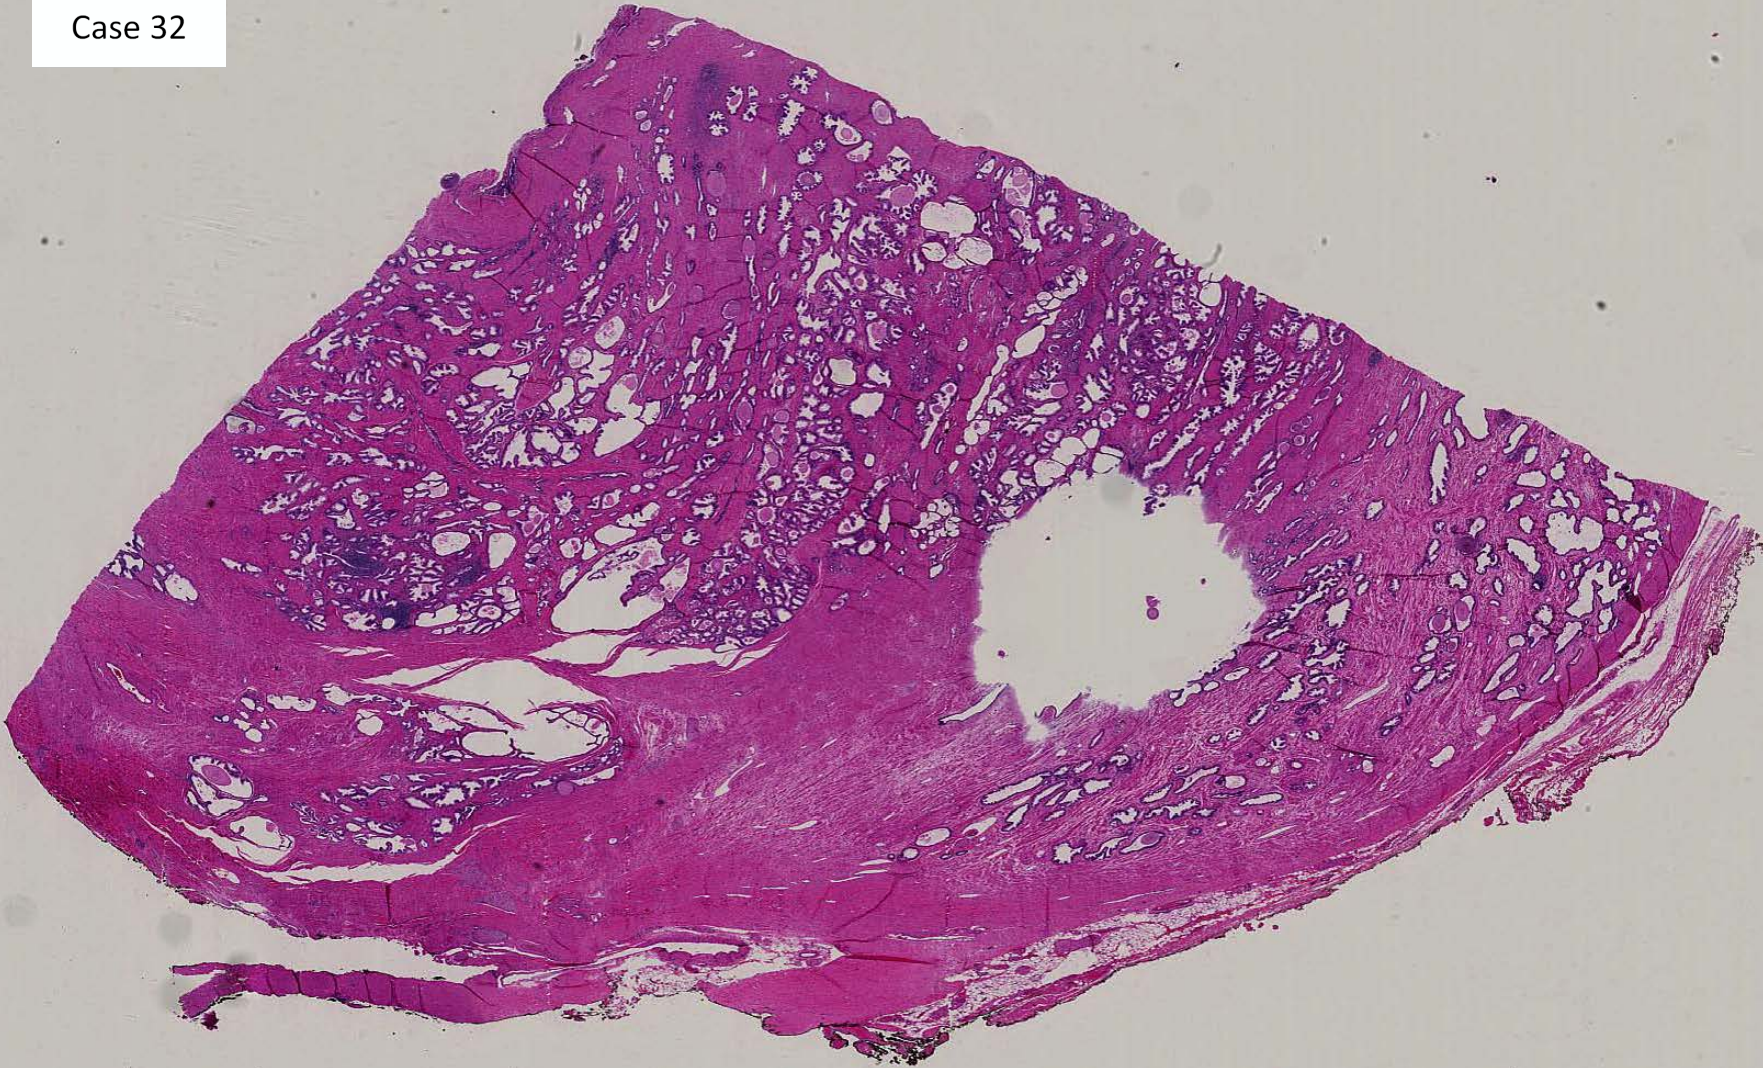

0 2.5 5 7.5 10 mm



Case 33

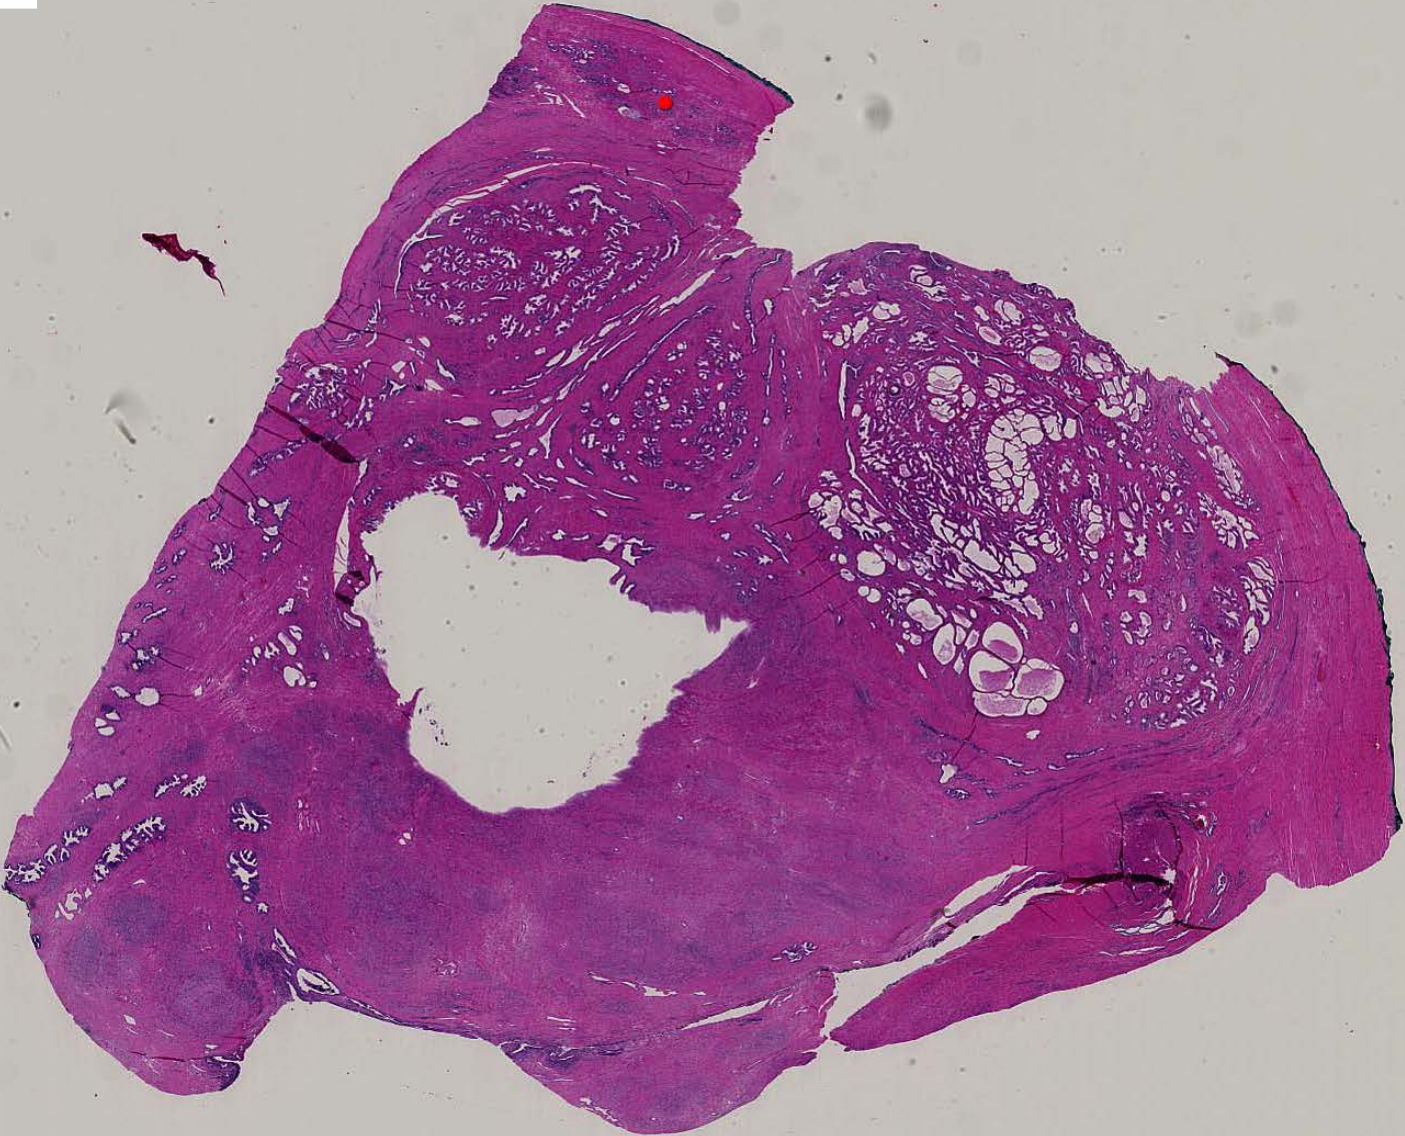

0 2.5 5 7.5 10 mm
